# Supplementary material
Source: JCI journal article supplement (doi:10.1172/jci198388)

# Uncropped/Unedited Full Blot Images

Figure 1C

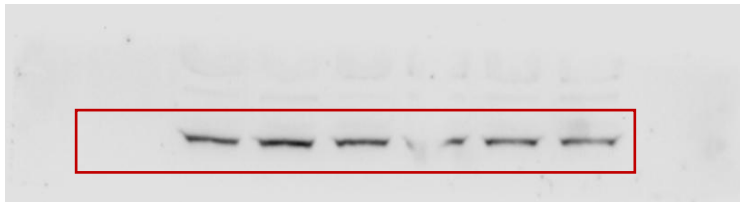

Autotaxin

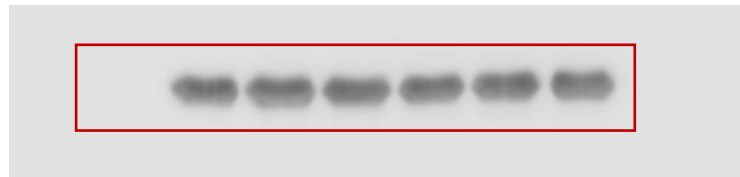

GAPDH

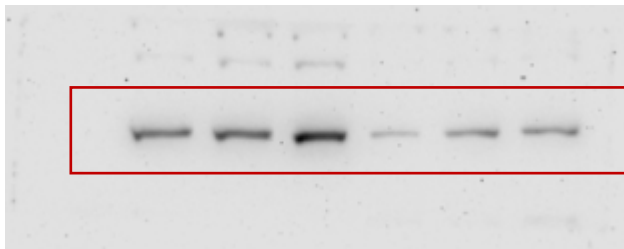

Autotaxin

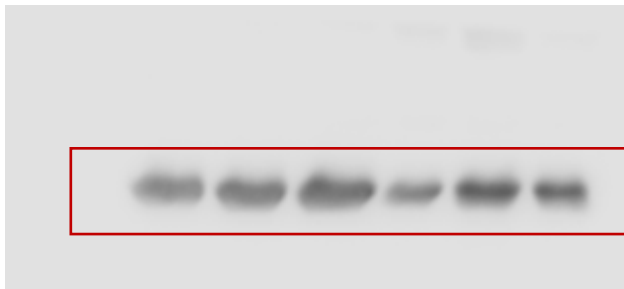

GAPDH

Figure 2B

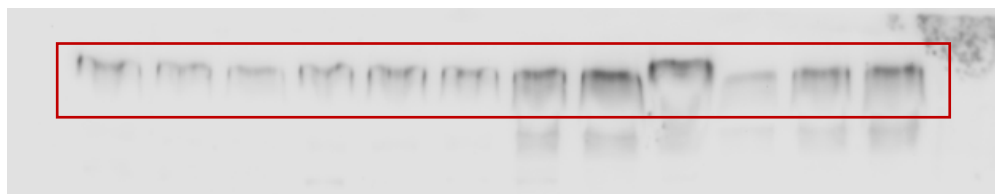

Fibronectin

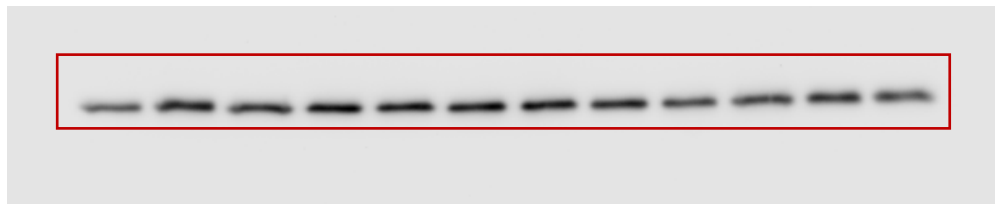

Tubulin

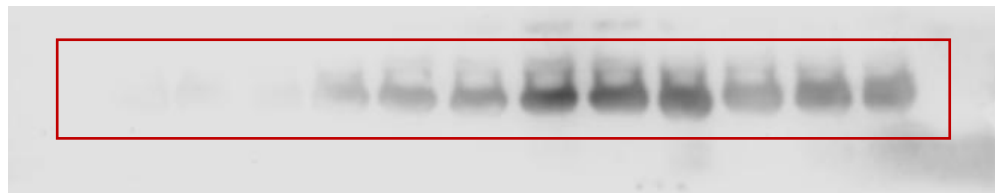

CCN2

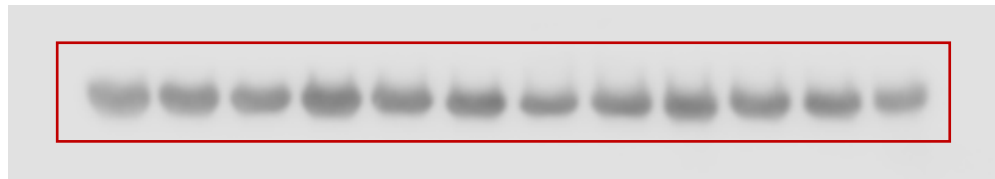

GAPDH

Figure 3B

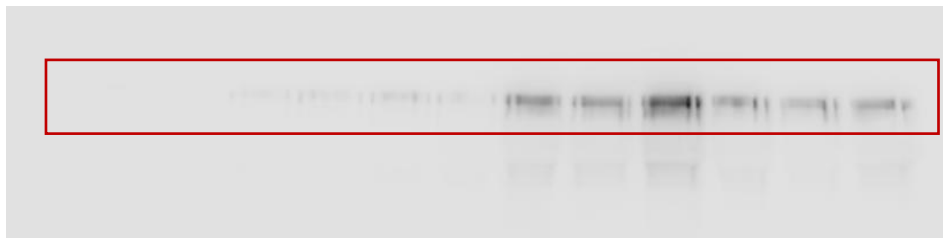

Fibronectin

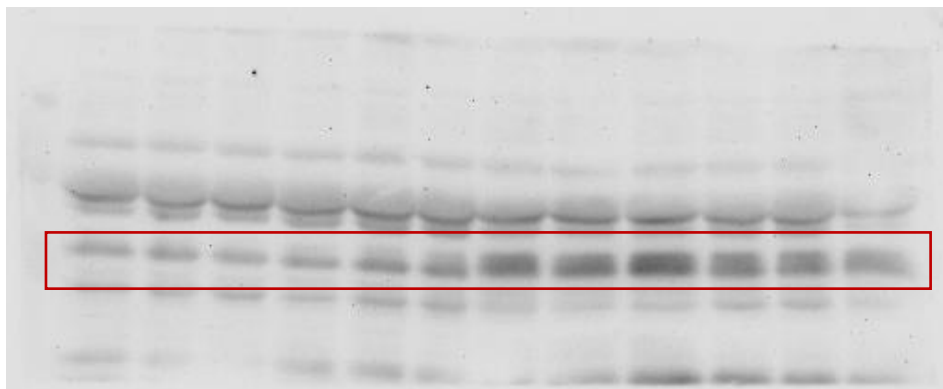

CCN2

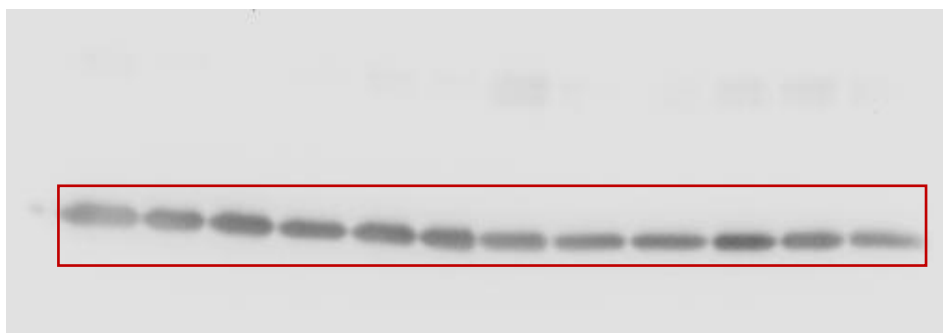

GAPDH

Figure 4A

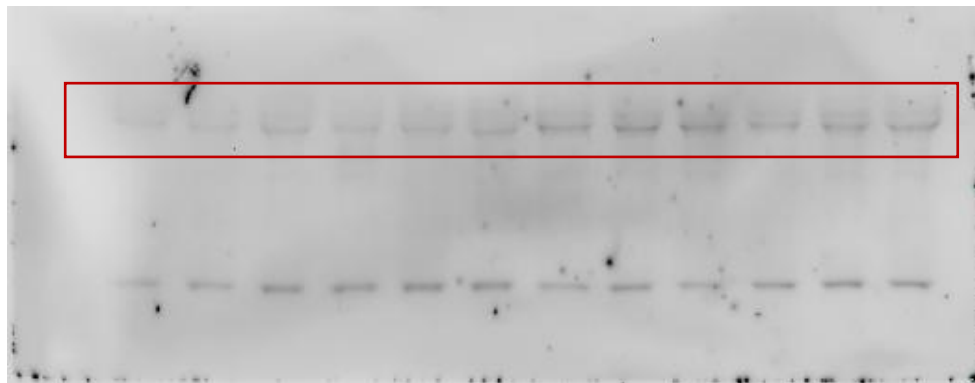

PDGFR $\alpha$

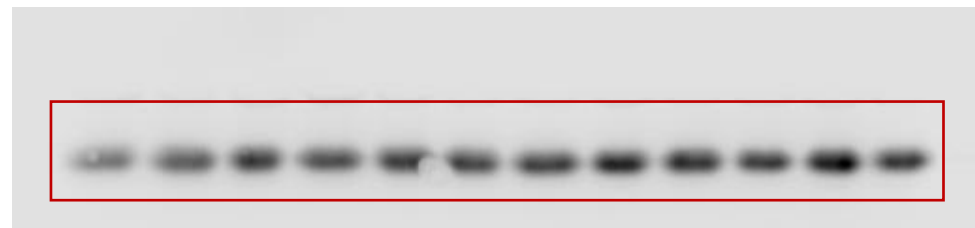

GAPDH

Figure 4B

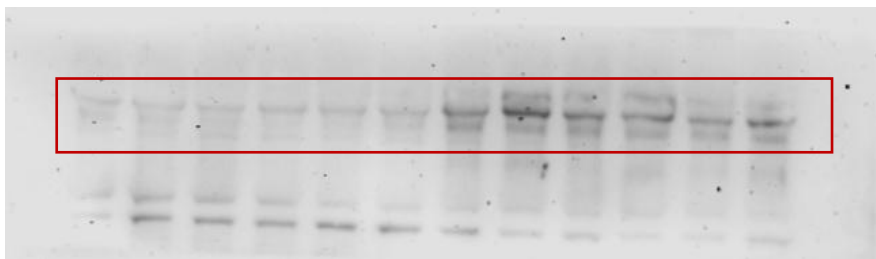

PDGFR $\alpha$

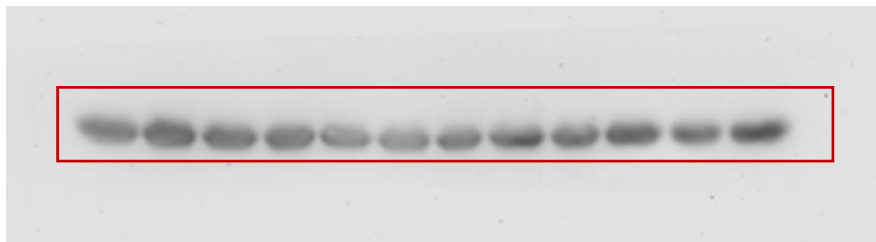

GAPDH

Figure 4C

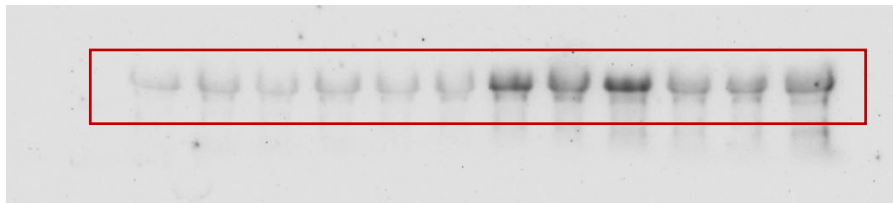

PDGFR $\alpha$

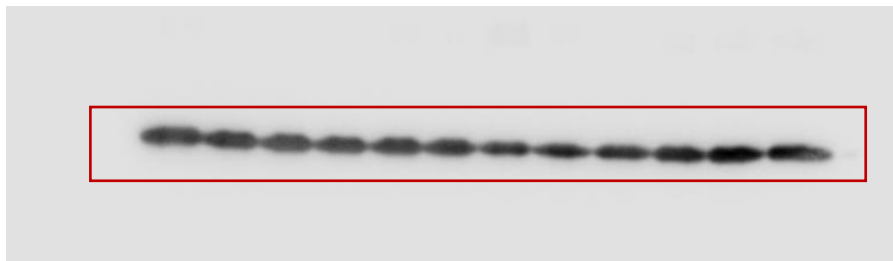

GAPDH

Figure 5A

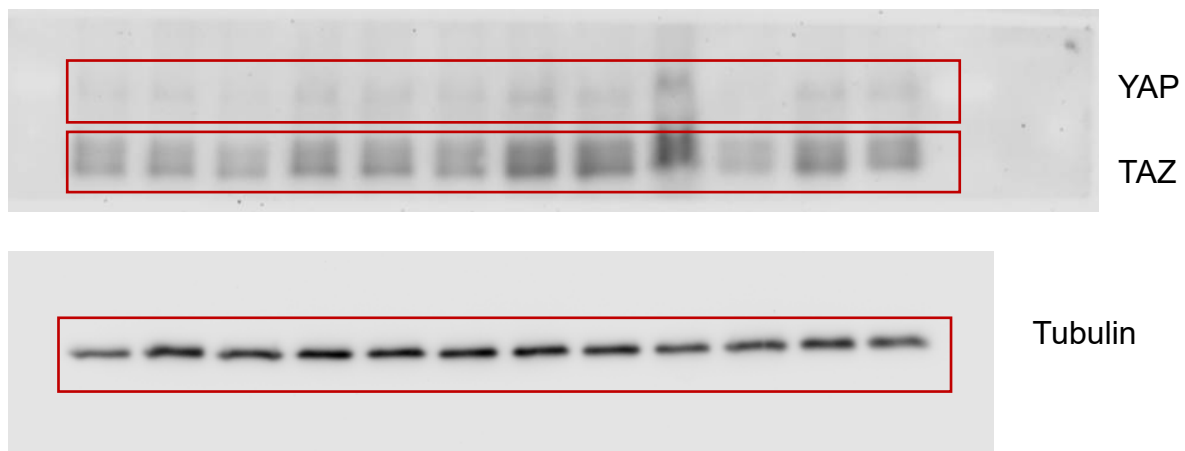

Figure 6B

Fibronectin

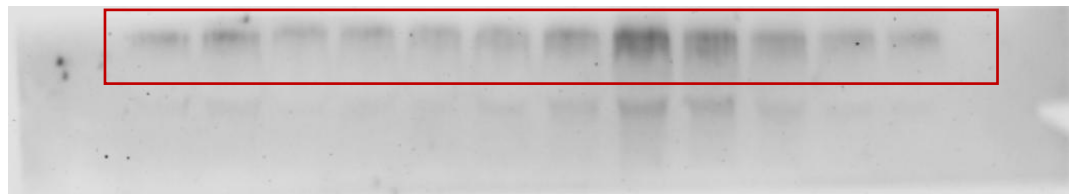

GAPDH

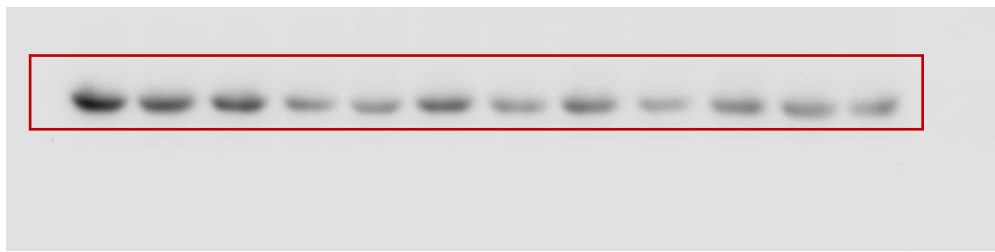

Figure 6D

YAP

TAZ

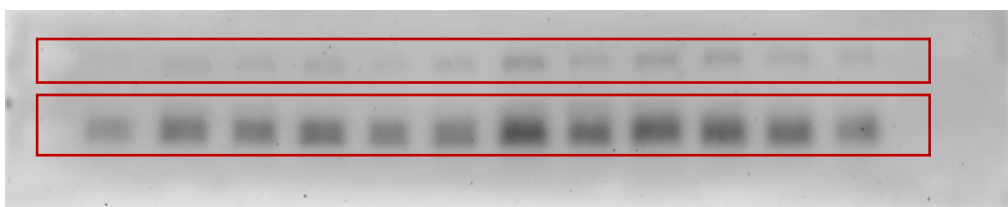

GAPDH

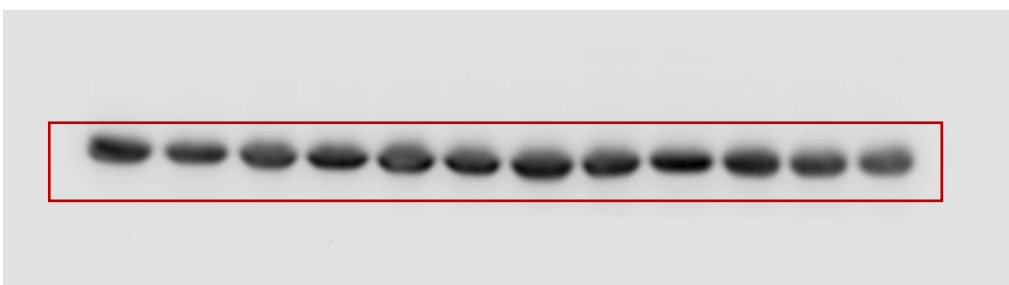

Figure 7C

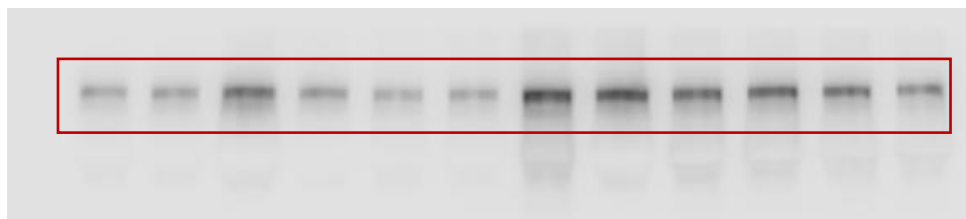

Fibronectin

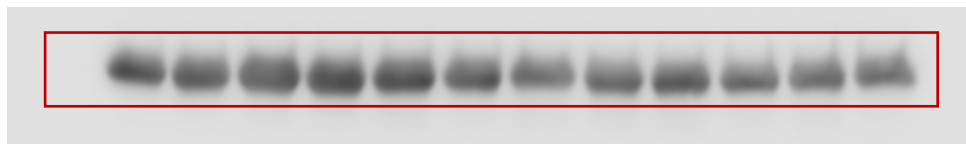

GAPDH

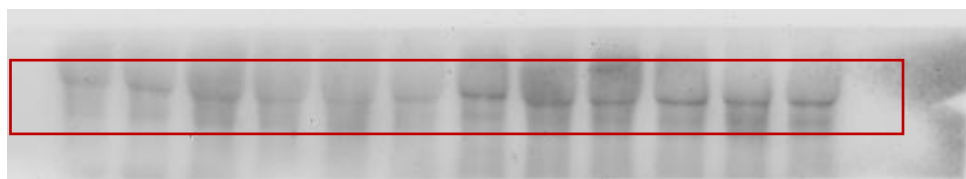

PDGFR $\alpha$

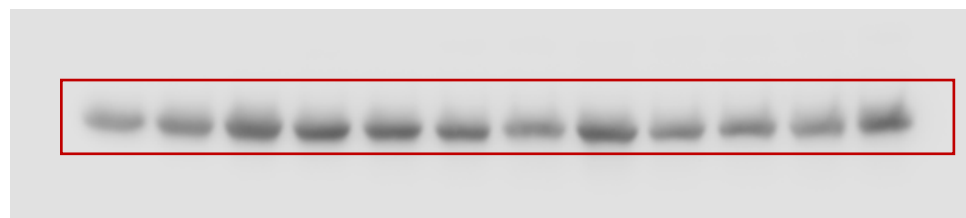

GAPDH

# SUPPLEMENTARY

Sup. Figure 3B

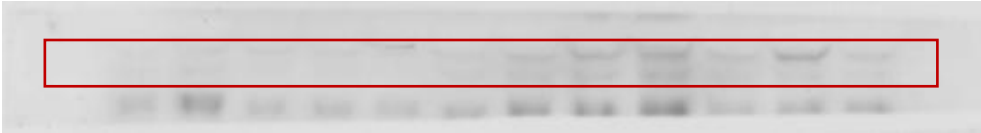

Murf1

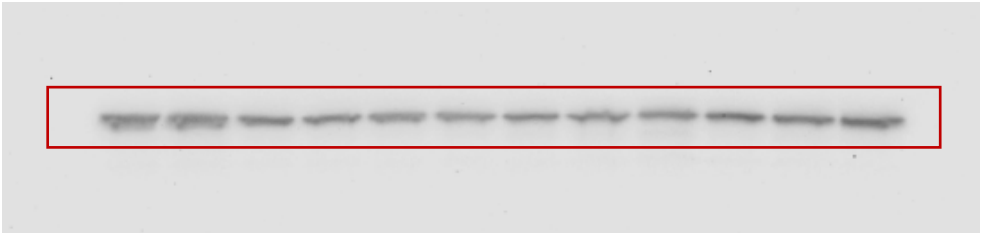

Tubulina

Sup. Figure 3F

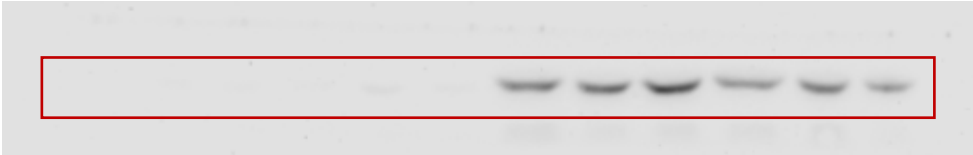

Murf1

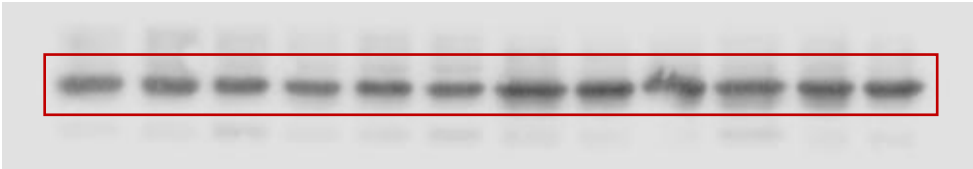

Tubulina

# SUPPLEMENTARY

Sup. Figure 4B

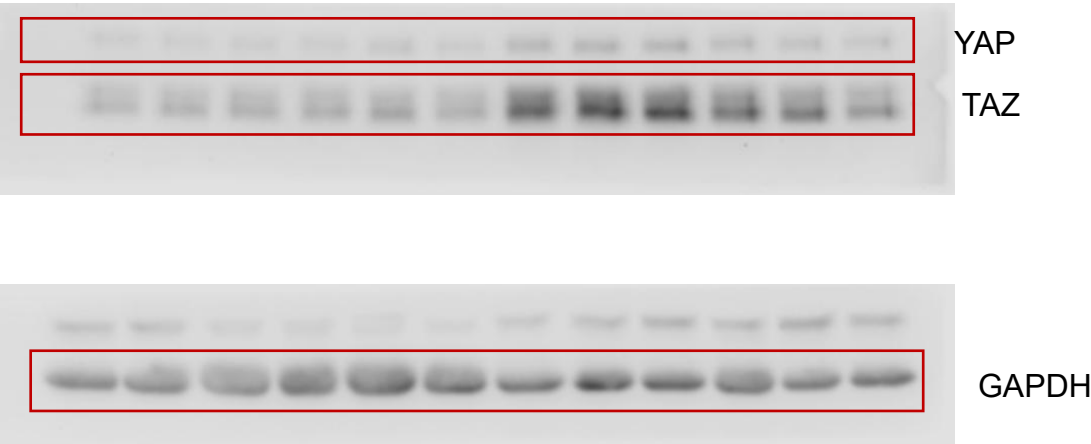

Supplement: sd2 [file 2]
