# Supplementary material
Source: JCI journal article supplement (doi:10.1172/jci198388)
Supplement: sd1 [file 1]

| <b>Gene</b>       | <b>Forward Sequence (5'-3')</b> | <b>Reverse Sequence (5'-3')</b> |
|-------------------|---------------------------------|---------------------------------|
| <i>Lpar1</i>      | CTGCCTCTACTTCCAGCCCTGTAA        | TGCTCACTGTGTTCCATTCTGTGG        |
| <i>Lpar2</i>      | GCTGGTTATTGCAGCCATCG            | ACACCCACGATGAGTGTGAC            |
| <i>Lpar3</i>      | CCACTTTCCTTCTACTACCTGCT         | GACGGTCAACGTTTTTCGACACC         |
| <i>Lpar4</i>      | GTCAACAATGCGACCACCAC            | CTTGCGGAGGGTTCTAAGCA            |
| <i>Lpar5</i>      | ACTCCACGCTGGCTGTATATG           | GTAGCCAAAGGCCTGGTATTC           |
| <i>Lpar6</i>      | GATCACTCTCTGCATCGCTGTTTC        | CCCTGAACTTCAGAGAACCTGGAG        |
| <i>Plpp1</i>      | GGGAGACTGGGCAAGACTCTT           | CACTCGAGAAAGGCCACAT             |
| <i>Plpp2</i>      | CGCGATCCAACCTCAACAACCT          | CAGCCCCGAACAGAAAGGT             |
| <i>Plpp3</i>      | CCATCCTGGCGATCATTACAG           | AAAGGAAGCATCCCACTTGCT           |
| <i>Enpp2</i>      | GACCCTAAAGCCATTATTGCTAA         | GGGAAGGTGCT GTTTCATGT           |
| <i>Ctgf/ Ccn2</i> | CAGGCTGGAGAAGCAGAGTCGT          | CTGGTGCAGCCAGAAAGCTCAA          |
| <i>Fn1</i>        | AGATTGGCGACAAGTGGAGG            | AGGTTTGCAGGTCCATTCCC            |
| <i>Colla1</i>     | GGTATGCTTGATCTGTATCTGC          | AGTCCAGTTCTTCATTGCATT           |
| <i>Ccn1</i>       | TAAGGTCTGCGCTAAACAACCTC         | CAGATCCCTTTCAGAGCGGT            |
| <i>Tagln2</i>     | AGCAGATCCTCATCCAGTGG            | CCATCTGCTTGAAGGCCA              |
| <i>Ankrd1</i>     | GGATGTGCCGAGGTTTCTGAA           | GTCCGTTTATACTCACAGAC            |
| <i>Trim63</i>     | GCTGGTGGAAAACATCATTGACAT        | CATCGGGTGGCTGCCTTT              |
| <i>Fbxo32</i>     | GCA AACACTGCCACATTCTCTC         | CTTGAGGGGAAAGTGAGACG            |
| <i>Gapdh</i>      | TGATGACATCAAGAAGGTGGTAAG        | TCCTTGAGGCCATGTAGGCCAT          |

**Supplementary Table 1.** RT-qPCR primers list used in this work.

**A**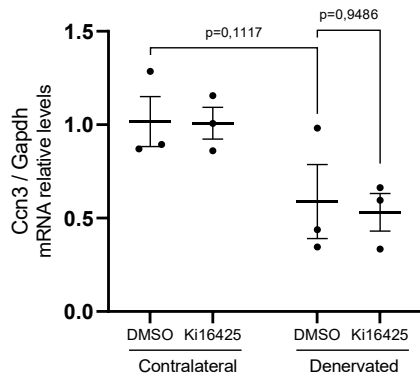**B**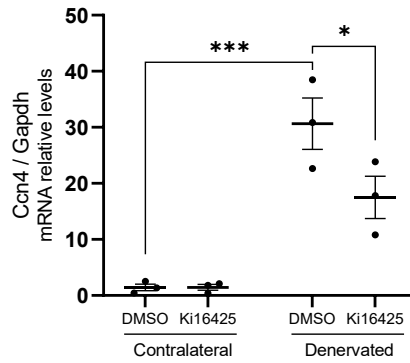

**Supplementary Figure 1: Pharmacological inhibition of LPA<sub>1</sub> and LPA<sub>3</sub> reduces the *Ccn4* levels after denervation.** The vehicle (DMSO) (n=3) or Ki16425 (n=3) was administered intraperitoneally to 6-month-old C57Bl/6J mice for three days before denervation and maintained the treatment daily for 2 weeks. *Ccn3* (A) and *Ccn4* (B) mRNA levels were measured by RT-qPCR. \*\*\*P < 0.001, \*P < 0.05 with One-way ANOVA test. Values represent means ± SEM.

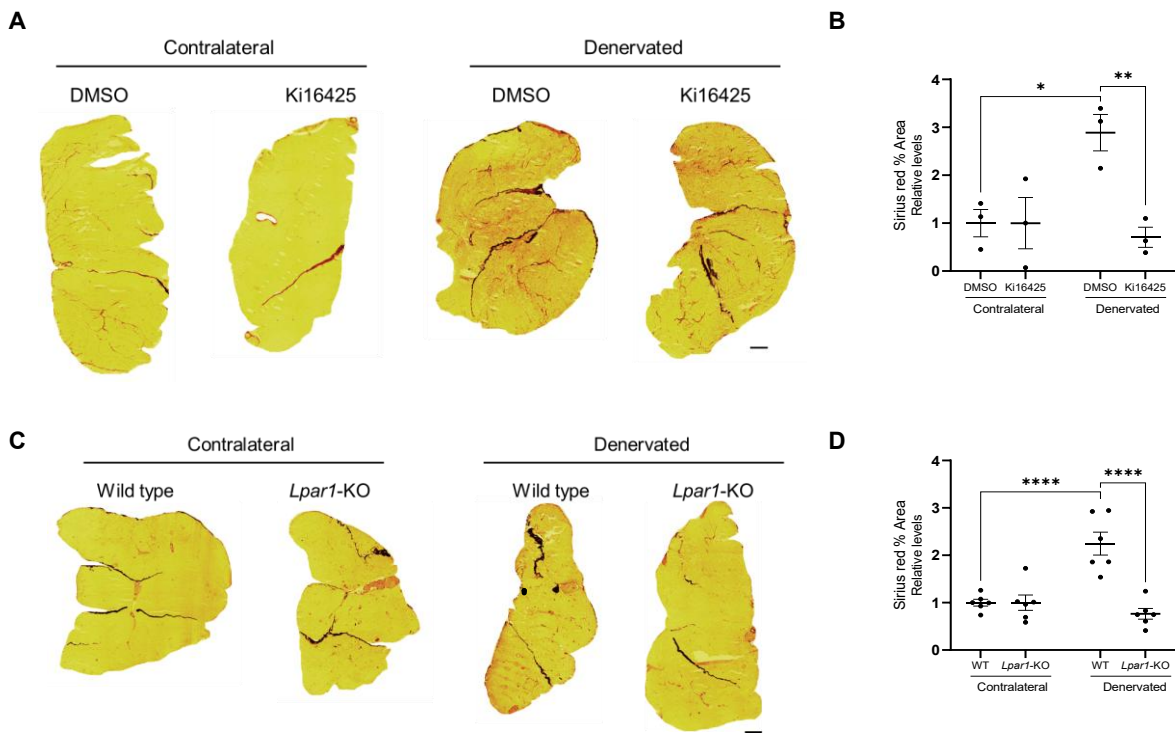

**Supplementary Figure 2: Pharmacological inhibition and genetic deletion of *Lpar1* reduce denervation-induced collagen accumulation.** **A:** The vehicle (DMSO) (n=3) or Ki16425 (n=3) was administered intraperitoneally to 6-month-old C57Bl/6J mice for three days before denervation and maintained the treatment daily for 2 weeks. Sirius red staining for total collagen. Bar: 400  $\mu$ m. **B:** Quantification of total collagen positive area (A). **C:** 6-month-old BALB/c (n=6) and *Lpar1*-KO (n=6) mice subjected to unilateral sciatic denervation for 2 weeks. Sirius red staining for total collagen. Bar: 400  $\mu$ m. **D:** Quantification of total collagen positive area (C). \*\*\*\*P < 0.0001, \*\*P < 0.01, \*P < 0.05 with One-way ANOVA test. Values represent means  $\pm$  SEM.

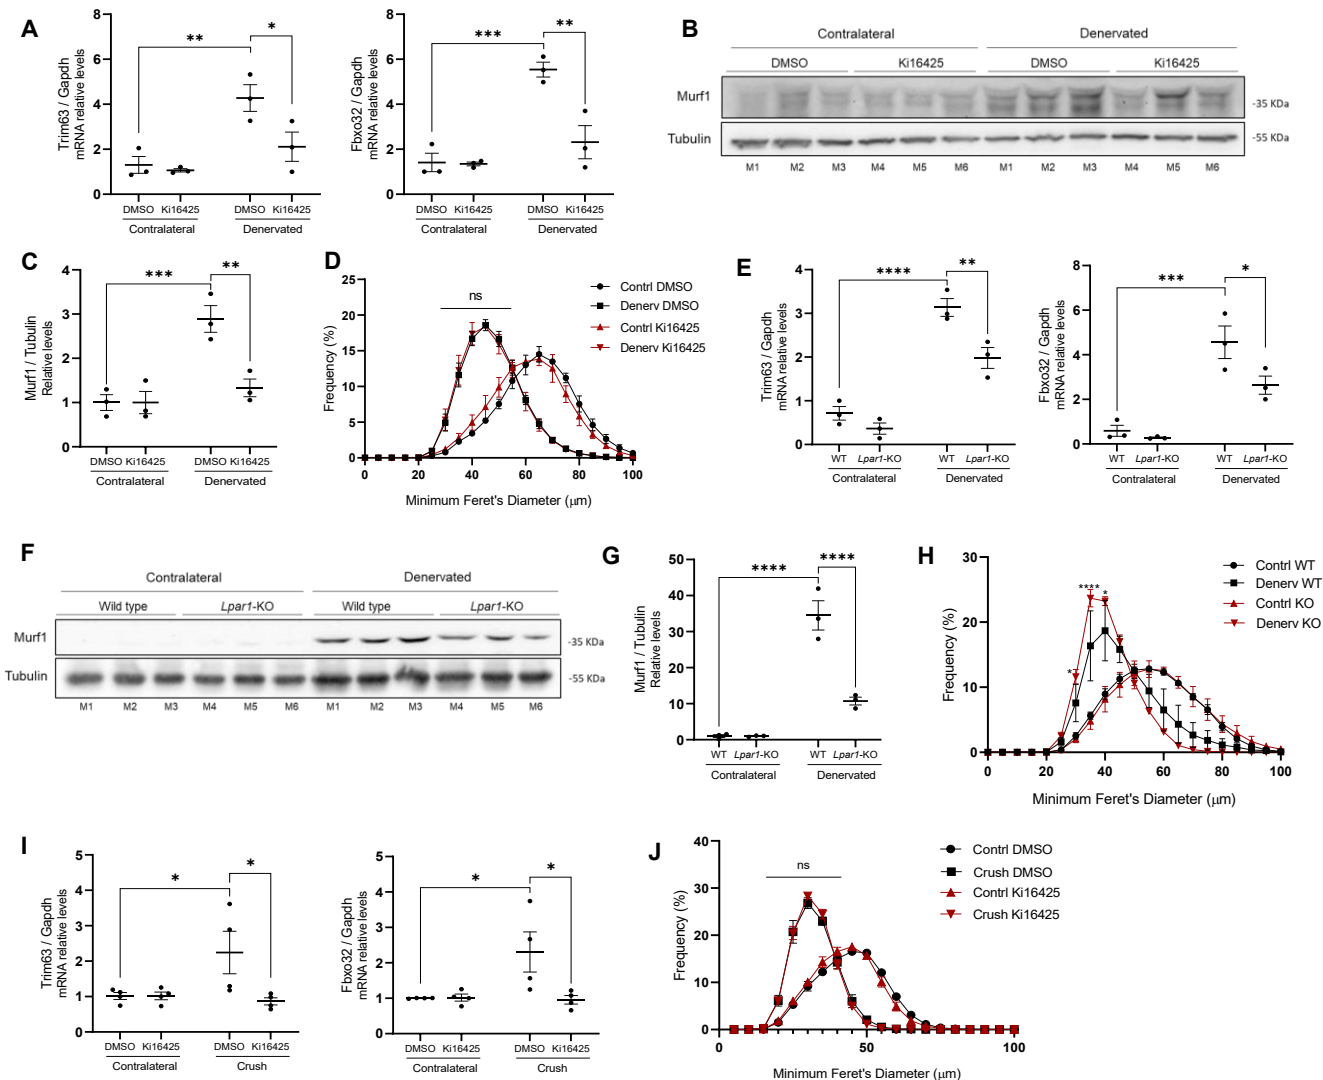

**Supplementary Figure 3: LPA signaling is required for the induction of skeletal muscle atrophy markers after denervation.**

6-month-old C57Bl/6J mice were treated with vehicle (DMSO) (n=3) or Ki16425 (n=3) for three days before unilateral sciatic denervation. Skeletal muscles from both hindlimbs were collected 2 weeks after denervation. **A:** MuRF1 (*Trim63*) and atrogen-1 (*Fbxo32*) mRNA levels were measured by RT-qPCR. **B:** GST homogenates were subjected to SDS-PAGE and immunoblotted for MuRF1. Tubulin was used as the loading control. **C:** Quantification of B. **D:** Frequency of muscle fiber size (μm). 6-month-old BALB/c (n=3) and *Lpar1*-KO (n=3) mice 2 weeks after being subjected to unilateral sciatic denervation. **E:** Relative mRNA levels of MuRF1 (*Trim63*) and atrogen-1 (*Fbxo32*). **F:** Western blot analysis of MuRF1. Tubulin was used as the loading control. **G:** Quantification of F. **H:** Frequency of muscle fiber size (μm). The vehicle (DMSO) (n=4) or Ki16425 (n=4) was administered intraperitoneally to 3-month-old C57Bl/6J mice for three days before crush surgery, and daily treatment was maintained for 2 weeks. **I:** Relative mRNA levels of MuRF1 (*Trim63*) and atrogen-1 (*Fbxo32*). **J:** Frequency of muscle fiber size (μm). \*\*\*\*P < 0.0001, \*\*\*P < 0.001, \*\*P < 0.01, \*P < 0.05 with One-way ANOVA test. Values represent means ± SEM.

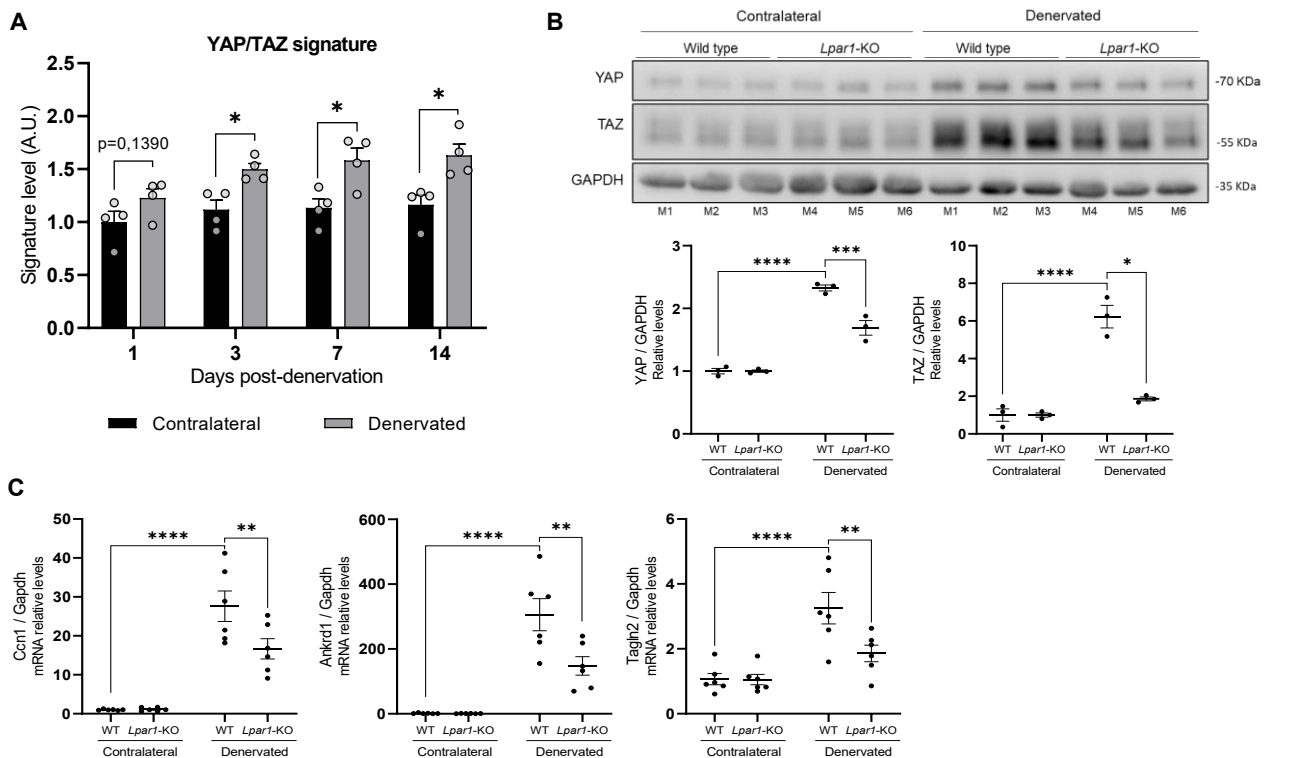

**Supplementary Figure 4 *Lpar1* deletion reduces YAP/TAZ accumulation and target gene induction after denervation.** **A:** RNA-seq analysis showing the signature score of YAP/TAZ upregulated genes in denervated and contralateral muscles (1-, 3-, 7-, and 14 days post-surgery) (70, 71). \* $P < 0.05$  with Student's t-test. Values represent means  $\pm$  SEM. **B, C:** 6-month-old BALB/c and *Lpar1*-KO mice were subjected to unilateral sciatic denervation for 2 weeks. **B:** Western blot for YAP and TAZ was performed. GAPDH was used as the loading control. Levels of YAP and TAZ were quantified ( $n=3$ ). **C:** Relative mRNA levels of *Ccn1*, *Tagln2*, and *Ankrd1* ( $n=6$ ). \*\*\*\* $P < 0.0001$ , \*\*\* $P < 0.001$ , \*\* $P < 0.01$ , \* $P < 0.05$ , with One-way ANOVA test. Values represent means  $\pm$  SEM.

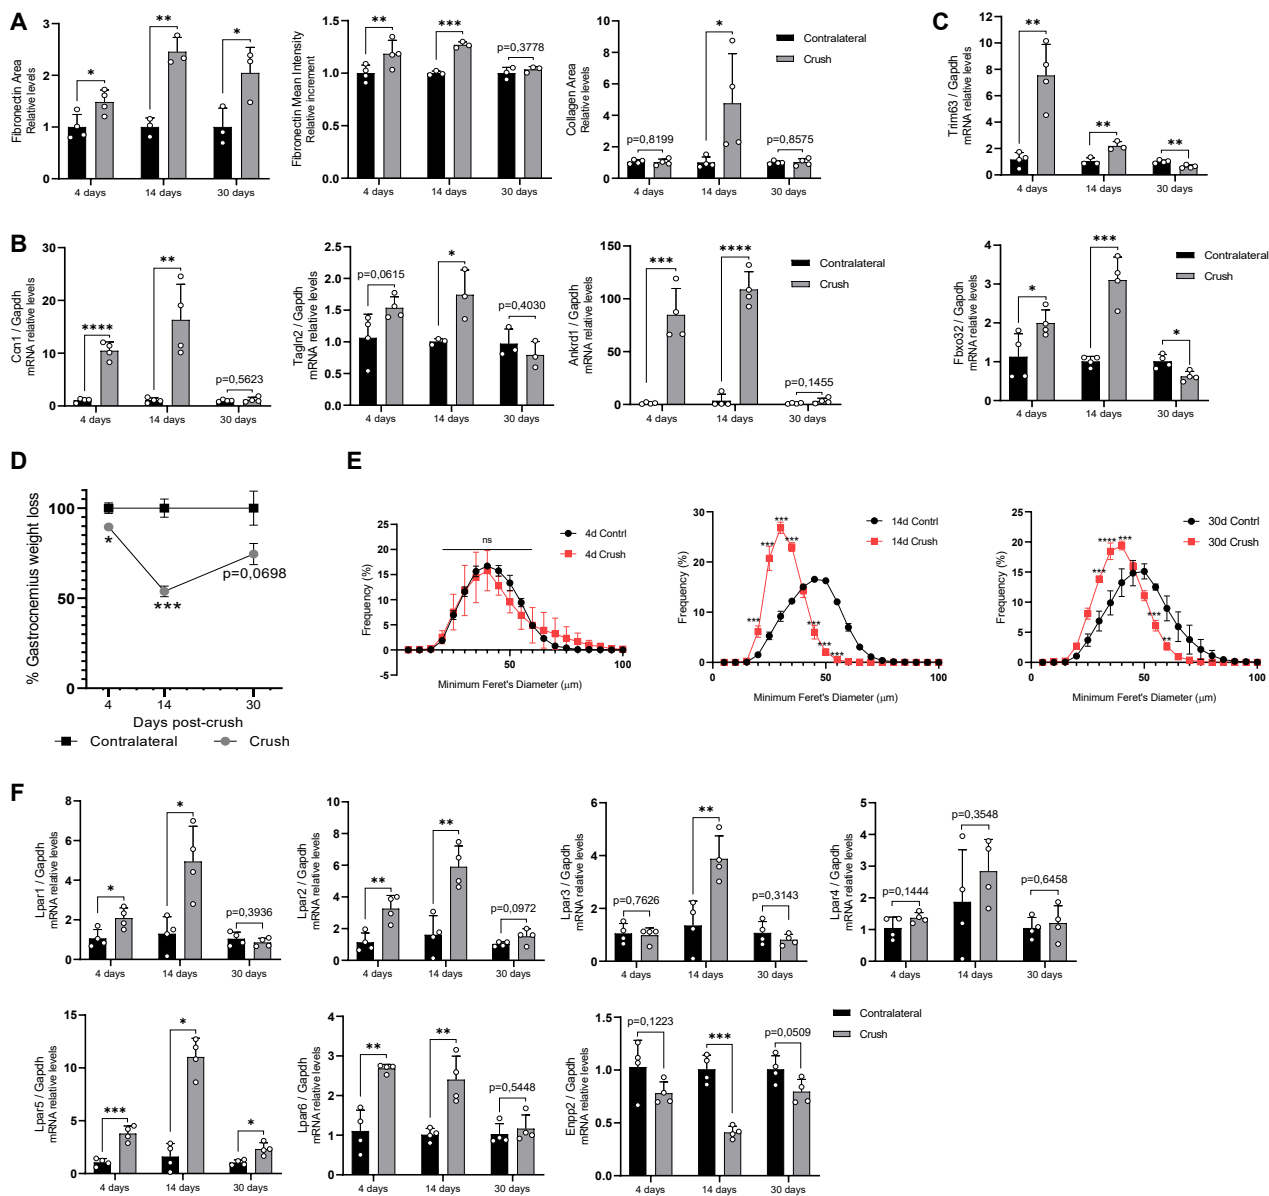

**Supplementary Figure 5: Denervation by crush induces a temporally fibrotic response, accompanied by YAP/TAZ, atrophy, and LPA signaling axis gene dysregulation.** 3-month-old *C57Bl/6J* mice were denervated by unilateral crush injury of the sciatic nerve. GST muscles were collected at 4, 14, and 30 days ( $n=3-4$ ). **A:** Quantification of fibronectin mean intensity, and fibronectin and total collagen positive area from GTS cross-sections. **B:** Relative mRNA levels of *Ccn1*, *Tagln2*, and *Ankrd1*. **C:** Relative mRNA levels of MuRF1 (*Trim63*) and atrogen-1 (*Fbxo32*). **D:** GST weight of crushed limb expressed as % of weight loss in comparison to de contralateral limb (100%). **E:** Frequency of muscle fiber size ( $\mu\text{m}$ ). **F:** RT-qPCR analysis showing LPARs (*Lpar1* to *Lpar6*), lipid phosphate phosphatases 1, 2, and 3 (*Plpp1*, *Plpp2*, and *Plpp3*), and autotaxin (*Enpp2*) mRNA expression. \*\*\*\* $P < 0.0001$ , \*\*\* $P < 0.001$ , \*\* $P < 0.01$ , \* $P < 0.05$  with Student's t-test (Contralateral vs. Crush). Values represent means  $\pm$  SEM.
